# Supplementary material
Source: Research Square preprint supplement (doi:10.21203/rs.3.rs-8568643/v1)
Supplement: Supplementary file 1 [file b5c13c3dbedb6cd34227ffa9.xlsx]

## Sheet: Chinese-English translation 
身份（1老师2学生）	Identity (1 Teacher 2 Student)
1、骨科常见病	1. Common orthopedic diseases
2.多发病的发病机制	2. Pathogenesis of frequently occurring diseases
3.多发病的临床特点	3. Clinical features of frequently occurring diseases
4.多发病的诊断与鉴别诊断及处理原则	4. Diagnosis, differential diagnosis, and management principles of frequently occurring diseases
5.骨科常用治疗技术(夹板、石膏和骨牵引固定技术等)的具体操作	5. Specific techniques for common orthopedic treatments (splinting, casting, skeletal traction, etc.)
6.并发症的预防及处理原则	6. Prevention and management principles of complications
7.封闭治疗的意义、操作方法、并发症的预防及处理	7. Significance, technique, prevention and management of complications of local injection therapy (block therapy)
8.骨科专业基本理论和基本知识	8. Basic theories and knowledge in orthopedics
9.术常见的骨折与脱位	9. Common fractures and dislocations in surgical practice
10.腰椎间盘突出症	10. Lumbar disc herniation
11.关节炎	11. Arthritis
12.骨肿瘤的骨科检查法	12. Orthopedic examination methods for bone tumors
13.与骨科有关的影像学及实验室检查方法	13. Imaging and laboratory examination methods related to orthopedics
14.骨科创伤(以骨折和脱位为主)的常用治疗方法及手术操作技术	14. Common treatment methods and surgical techniques for orthopedic trauma (mainly fractures and dislocations)
15.开放性伤口清创闭合的原则	15. Principles of debridement and closure for open wounds
16.手外伤清创	16. Debridement of hand injuries
17.皮肤缺损的修复	17. Repair of skin defects
18.肌腱吻合及骨科内固定的基本技术	18. Basic techniques for tendon anastomosis and orthopedic internal fixation
19.腰椎间盘突出症、颈椎病、腰扭伤、狭窄性腱鞘炎、半月板损伤、网球肘等的非手术治疗方法与原则	19. Non-surgical treatment methods and principles for lumbar disc herniation, cervical spondylosis, lumbar sprain, stenosing tenosynovitis, meniscus injury, tennis elbow, etc.
20.常见部位骨折 10例是否合适?是/否=1/2	20. Is 10 cases of fractures in common sites appropriate? Yes/No=1/2
21.运动系统慢性损伤 5例是否合适?是/否=1/2	21. Is 5 cases of chronic sports system injuries appropriate? Yes/No=1/2
22.颈椎病5例是否合适?是/否=1/2	22. Is 5 cases of cervical spondylosis appropriate? Yes/No=1/2
23.骨肿瘤 2例是否合适?是/否=1/2	23. Is 2 cases of bone tumors appropriate? Yes/No=1/2
24.常见部位关节脱位 10例是否合适?是/否=1/2	24. Is 10 cases of joint dislocations in common sites appropriate? Yes/No=1/2
25.腰椎间盘突出症 例是否合适?是/否=1/2	25. Is (number missing) cases of lumbar disc herniation appropriate? Yes/No=1/2
26.骨与关节感染 5例是否合适?是/否=1/2	26. Is 5 cases of bone and joint infections appropriate?Yes/No=1/2
27.常见部位骨折的手法复位 、夹板 、石膏外固定 10 例是否合适?是/否=1/2	27. Is 10 cases of manual reduction, splinting, and cast external fixation for common fractures appropriate? Yes/No=1/2
28.常见部位关节脱位的手法复位 5例是否合适?是/否=1/2	28. Is 5 cases of manual reduction for common joint dislocations appropriate? Yes/No=1/2
29.常见部位的骨牵引 5 例是否合适?是/否=1/2	29. Is 5 cases of skeletal traction for common sites appropriate? Yes/No=1/2
30.手外伤的清创 、缝合 、皮肤缺损的修复及肌腱吻合术 5例是否合适?是/否=1/2	30. Is 5 cases of debridement, suturing, skin defect repair, and tendon anastomosis for hand injuries appropriate? Yes/No=1/2
31.开放性骨折的清创 、切开复位内固定术 5 例是否合适?是/否=1/2	31. Is 5 cases of debridement, open reduction and internal fixation for open fractures appropriate? Yes/No=1/2
32.腰椎或颈椎手术 3例是否合适?是/否=1/2	32. Is 3 cases of lumbar or cervical spine surgery appropriate? Yes/No=1/2
33.人工关节置换术 2 例是否合适?是/否=1/2	33. Is 2 cases of artificial joint replacement appropriate? Yes/No=1/2
34.四肢常见的骨及软组织肿瘤手术 2例是否合适?是/否=1/2	34. Is 2 cases of surgery for common bone and soft tissue tumors of the extremities appropriate? Yes/No=1/2
35.您认为还需要增加哪些理论、操作、病例收集的内容?（简答）	35. What additional theoretical knowledge, practical skills, or case collection content do you think should be included? (Brief answer)

## Sheet: Questionnaire
Identity (1 Teacher 2 Student)	1. Common orthopedic diseases	2. Pathogenesis of frequently occurring diseases	3. Clinical features of frequently occurring diseases	4. Diagnosis, differential diagnosis, and management principles of frequently occurring diseases	5. Specific techniques for common orthopedic treatments (splinting, casting, skeletal traction, etc.)	6. Prevention and management principles of complications	7. Significance, technique, prevention and management of complications of local injection therapy (block therapy)	8. Basic theories and knowledge in orthopedics	9. Common fractures and dislocations in surgical practice	10. Lumbar disc herniation	11. Arthritis	12. Orthopedic examination methods for bone tumors	13. Imaging and laboratory examination methods related to orthopedics	14. Common treatment methods and surgical techniques for orthopedic trauma (mainly fractures and dislocations)	15. Principles of debridement and closure for open wounds	16. Debridement of hand injuries	17. Repair of skin defects	18. Basic techniques for tendon anastomosis and orthopedic internal fixation	19. Non-surgical treatment methods and principles for lumbar disc herniation, cervical spondylosis, lumbar sprain, stenosing tenosynovitis, meniscus injury, tennis elbow, etc.	20. Is 10 cases of fractures in common sites appropriate? Yes/No=1/2	21. Is 5 cases of chronic sports system injuries appropriate? Yes/No=1/2	22. Is 5 cases of cervical spondylosis appropriate? Yes/No=1/2	23. Is 2 cases of bone tumors appropriate? Yes/No=1/2	24. Is 10 cases of joint dislocations in common sites appropriate? Yes/No=1/2	25. Is (number missing) cases of lumbar disc herniation appropriate? Yes/No=1/2	26. Is 5 cases of bone and joint infections appropriate?Yes/No=1/2	27. Is 10 cases of manual reduction, splinting, and cast external fixation for common fractures appropriate? Yes/No=1/2	28. Is 5 cases of manual reduction for common joint dislocations appropriate? Yes/No=1/2	29. Is 5 cases of skeletal traction for common sites appropriate? Yes/No=1/2	30. Is 5 cases of debridement, suturing, skin defect repair, and tendon anastomosis for hand injuries appropriate? Yes/No=1/2	31. Is 5 cases of debridement, open reduction and internal fixation for open fractures appropriate? Yes/No=1/2	32. Is 3 cases of lumbar or cervical spine surgery appropriate? Yes/No=1/2	33. Is 2 cases of artificial joint replacement appropriate? Yes/No=1/2	34. Is 2 cases of surgery for common bone and soft tissue tumors of the extremities appropriate? Yes/No=1/2	35. What additional theoretical knowledge, practical skills, or case collection content do you think should be included? (Brief answer)
1	4	4	4	3	2	4	2	3	2	3	3	2	2	2	4	4	4	2	2	1	1	1	1	1	1	1	1	1	1	1	1	1	1	1	无
1	3	3	3	4	4	4	3	3	3	3	2	2	2	2	3	3	3	3	3	1	1	1	1	1	1	1	1	1	1	1	1	1	1	1	暂无
1	4	4	4	4	2	4	2	4	4	4	4	2	4	4	4	1	1	2	3	1	1	1	2	2	2	2	2	2	2	2	2	1	1	1	暂无
1	2	2	2	2	2	3	2	3	3	3	2	2	3	3	3	3	2	3	2	1	1	1	1	2	1	2	1	2	2	1	1	1	1	1	了解脊髓损伤
1	4	3	4	4	2	3	2	4	2	3	3	2	3	2	2	1	1	2	2	2	1	1	1	2	1	2	2	2	2	2	1	1	1	1	暂无
1	4	4	4	4	4	4	3	4	4	4	4	4	4	4	4	4	4	4	4	1	1	1	1	2	1	2	1	2	2	1	1	1	2	1	没有补充
1	3	3	3	2	4	3	4	4	3	3	3	2	3	2	4	4	3	3	3	1	1	1	1	2	1	2	2	2	2	2	2	1	1	1	无
1	3	3	3	3	3	3	2	3	3	3	3	3	3	3	3	3	3	3	2	1	1	1	1	1	1	1	1	1	1	1	1	1	1	1	暂无
1	4	4	4	4	4	3	3	4	4	4	4	3	4	4	3	3	3	3	3	1	1	1	1	1	1	1	1	1	1	1	1	1	1	1	无
1	4	3	4	4	4	4	3	3	4	3	3	2	4	4	4	4	4	4	3	1	1	1	2	2	2	2	1	1	1	1	1	1	1	2	复杂伤口换药处理
1	4	3	3	4	3	3	2	4	4	4	4	3	3	4	4	4	3	3	3	2	1	1	1	1	2	1	1	1	1	1	1	1	2	1	骨科基本康复
2	4	4	4	4	4	4	4	4	4	4	4	4	4	4	4	4	4	4	4	1	1	1	1	1	1	1	1	1	1	1	1	1	1	1	无
2	2	2	2	2	3	3	1	3	4	2	2	2	3	3	4	4	3	2	2	1	1	1	1	1	1	1	1	1	1	1	1	1	1	1	无
2	3	3	4	4	4	3	3	4	3	3	2	4	4	4	4	4	4	4	3	1	1	1	1	1	1	2	1	1	2	1	1	2	1	1	骨科影像学内容 阅片
2	4	4	4	4	4	4	4	4	4	4	4	4	4	4	4	4	4	4	4	1	1	1	1	1	1	1	1	1	1	1	1	1	1	1	无
2	4	4	4	4	4	4	4	4	4	4	4	4	4	4	4	4	4	4	4	1	2	1	1	2	1	1	1	1	1	1	1	1	1	1	无
2	4	4	4	4	4	4	4	4	4	4	4	4	4	4	4	4	4	4	4	1	1	1	1	1	1	1	1	1	1	1	1	1	1	1	无
2	4	4	4	4	4	4	4	4	4	4	4	4	4	4	4	4	4	4	4	1	1	1	1	1	1	1	1	1	1	1	1	1	1	1	无
2	4	4	3	3	4	4	4	4	4	4	4	4	4	4	4	4	4	4	4	1	1	1	1	1	1	1	1	1	1	1	1	1	1	1	无
2	4	4	4	4	4	4	4	4	4	4	4	4	4	4	4	4	4	4	4	1	1	1	1	1	1	1	1	1	1	1	1	1	1	1	增加骨科常技能操作及查体培训
2	4	4	4	4	4	4	4	4	4	4	4	4	4	4	4	4	4	4	4	1	1	1	1	1	1	1	1	2	2	2	2	2	2	2	暂无
2	4	3	3	3	4	4	3	4	4	4	3	3	4	4	3	3	3	3	4	1	1	1	1	1	1	1	1	1	1	1	1	1	1	1	关于骨肿瘤转移的治疗原则及治疗方案
2	4	4	4	4	4	4	4	4	4	4	4	4	4	4	4	4	4	4	4	1	1	1	1	1	1	1	1	1	1	1	1	1	1	1	无
2	4	4	4	4	4	4	3	4	4	3	3	3	3	4	4	4	4	4	3	1	1	1	1	1	1	1	1	1	1	1	1	1	1	1	很全面，暂无补充
2	4	4	4	4	4	4	4	4	4	4	4	4	4	4	4	4	4	4	4	1	1	1	1	1	1	1	1	1	1	1	1	1	1	1	无
2	3	3	3	3	2	2	2	2	4	4	3	4	4	4	3	3	3	4	4	1	1	1	1	1	1	1	1	1	1	1	1	1	1	1	无
2	3	3	3	3	3	3	3	3	3	3	3	3	3	3	3	3	3	3	3	1	1	1	1	1	1	1	1	1	1	1	1	1	1	1	不需要
	3.62963	3.48148	3.55556	3.55556	3.48148	3.59259	3.07407	3.66667	3.62963	3.55556	3.37037	3.18519	3.55556	3.55556	3.66667	3.51852	3.37037	3.40741	3.2963
