# Supplementary material
Source: Research Square preprint supplement (doi:10.21203/rs.3.rs-8568643/v1)
Supplement: Supplementary file 2 [file e565c3a9b0821950c6b8da3e.xlsx]

## Sheet: english annotation
Identity	身份
1. Disinfection and Aseptic Technique	1、消毒与无菌技术	Questions 1-24 are scored using a 4-point system. Participants can rate the training content based on its importance, frequency of occurrence, and consequences. 4 points - Extremely important. This task is encountered frequently in daily work; failure to complete the task correctly and/or in a timely manner may result in patient death or permanent disability. 3 points - Important. This task is en…
2. Water and Electrolyte Balance and Disorders	2.水与电解质平衡及紊乱	Questions 25-54 are judged by yes/no. 1 = Yes; 2 = No
3. Surgical Shock	3.外科休克
4. Multiple Organ Dysfunction	4.多器官功能障碍
5. Trauma	5.创伤
6. Surgical Infection	6.外科感染
7. Theoretical Knowledge of Cardiopulmonary Resuscitation (CPR)	7.心肺复苏理论知识
8. Surgical Nutrition	8.外科营养
9. Principles of Preoperative Preparation and Postoperative Management	9.术前准备和术后处理原则
10. Rational Clinical Blood Use	10.临床合理用血知识
11. Indications for Surgical Blood Transfusion	11.外科输血指征
12. Basic Surgical Medications	12.外科基本用药
13. Fundamental Theory of Laparoscopic Surgery	13.腹腔镜手术基本理论
14. Emergency Management Principles for Critically Ill General Surgery Patients	14.普通外科危重病人的抢救原则
15. Advances in Organ Transplantation	15.器官移植进展状况
16. Surgical Dressing Change	16.外科换药
17. Surgical Techniques: Incision, Exposure, Suturing, Ligation, and Hemostasis	17.外科手术切开、显露、缝合、结扎、止血技术
18. Catheterization	18.导尿
19. Venotomy	19.静脉切开
20. Central Venous Pressure Measurement	20.中心静脉压测量
21. Biopsy	21.活组织检查
22. Abdominal Paracentesis	22.腹腔穿刺术
23. Practical CPR Skills	23.心肺复苏实践操作
24. Fine-Needle Aspiration Biopsy of Superficial Masses	24.浅表肿物针吸活检
25. Furuncle and Furunculosis — Are 10 Cases Appropriate? Yes / No — 1/2	25.疖和疖病 10例是否合适?是/ 否=1/2
26. Acute Mastitis — Is 1 Case Appropriate? Yes / No =1/2	26.急性乳腺炎 1例是否合适?是/ 否=1/2
27. Carbuncle — Is 1 Case Appropriate? Yes / No =1/2	27.痈 1例是否合适?是/ 否=1/2
28. Systemic Acute Suppurative Infection — Are 2 Cases Appropriate? Yes / No =1/2	28.全身急性化脓性感染 2例是否合适?是/ 否=1/2
29. Acute Cellulitis and Erysipelas — Are 5 Cases Appropriate? Yes / No =1/2	29.急性蜂窝织炎、丹毒 5例是否合适?是/ 否=1/2
30. Anal Fistula, Anal Papillitis, and Perianal Infection — Are 5 Cases Appropriate? Yes / No =1/2	30.肛瘘、肛乳头炎、肛门周围感染 5例是否合适?是/ 否=1/2
31. Acute Lymphangitis and Lymphadenitis — Are 5 Cases Appropriate? Yes / No =1/2	31.急性淋巴管炎、淋巴结炎 5例是否合适?是/ 否=1/2
32. Internal and External Hemorrhoids — Are 10 Cases Appropriate? Yes / No =1/2	32.内、外痔 10例是否合适?是/ 否=1/2
33. Phlebitis — Are 3 Cases Appropriate?Yes / No =1/2	33.静脉炎 3 例是否合适?是/ 否=1/2
34. Superficial Tumors — Are 20 Cases Appropriate? Yes / No =1/2	34.体表肿瘤 20例是否合适?是/ 否=1/2
35. Abscess — Are 5 Cases Appropriate? Yes / No =1/2	35.脓肿 5 例是否合适?是/ 否=1/2
36. External Hernia — Are 5 Cases Appropriate? Yes / No =1/2	36.腹外疝 5例是否合适?是/ 否=1/2
37. Acute Appendicitis — Are 5 Cases Appropriate? Yes / No =1/2	37.急性阑尾炎 5 例是否合适?是/ 否=1/2
38. Mammary Gland Hyperplasia — Are 5 Cases Appropriate? Yes / No =1/2	38.乳腺增生 5例是否合适?是/ 否=1/2
39. Thyroid Adenoma or Nodular Goiter — Are 5 Cases Appropriate? Yes / No =1/2	39.甲状腺瘤或结节性甲状腺肿 5 例是否合适?是/ 否=1/2
40. Gallstones — Are 5 Cases Appropriate? Yes / No =1/2	40.胆囊结石 5例是否合适?是/ 否=1/2
41. Breast Cancer — Are 5 Cases Appropriate? Yes / No =1/2	41.乳腺癌 5 例是否合适?是/ 否=1/2
42. Intestinal Obstruction — Are 5 Cases Appropriate? Yes / No =1/2	42.肠梗阻 5例是否合适?是/ 否=1/2
43. Gastrointestinal Tumors — Are 5 Cases Appropriate? Yes / No=1/2	43.胃肠肿瘤 5例是否合适?是/ 否=1/2
44. Hernia Repair — Are 5 Cases Appropriate? Yes / No =1/2	44.完成疝修补术 5 例是否合适?是/ 否=1/2
45. Appendectomy — Are 5 Cases Appropriate? Yes / No =1/2	45.完成阑尾切除术 5例是否合适?是/ 否=1/2
46. Biopsy of Superficial Masses — Are 5 Cases Appropriate? Yes / No =1/2	46.完成体表肿物活检 5 例是否合适?是/ 否=1/2
47. Thyroid Surgery — Are 5 Cases Appropriate? Yes / No =1/2	47.完成甲状腺手术 5例是否合适?是/ 否=1/2
48. Participation in Thyrotoxicosis or Bilateral Subtotal Thyroidectomy — Are 10 Cases Appropriate? Yes / No =1/2	48.参与甲亢或双侧甲状腺次全切除术 10 例是否合适?是/ 否=1/2
49. Participation in Colectomy — Are 5 Cases Appropriate? Yes / No =1/2	49.参与结肠切除术 5例是否合适?是/ 否=1/2
50.Participating in thyroid surgery 5 cases is appropriate? Yes / No =1/2	50.参与乳腺癌改良根治或根治术 5 例是否合适?是/ 否=1/2
51.Completing biopsy of superficial tumor 5 cases is appropriate?Yes / No =1/2	51.参与胆囊切除术 10例是否合适?是/ 否=1/2
52.Completing appendectomy 5 cases is appropriate? Yes / No =1/2	52.参与胃大部切除术 5 例是否合适?是/ 否=1/2
53.Completing hernia repair 5 cases is appropriate?Yes / No =1/2	53.参与肠梗阻、肠切除吻合术 2例是否合适?是/ 否=1/2
54.Completing colon resection 5 cases is appropriate? Yes / No =1/2	54.参与胆总管探查、胆管空肠吻合术 2例是否合适?是/ 否=1/2

## Sheet: Questionnaire
Identity (1 Teacher 2 Student)	1. Disinfection and Aseptic Technique	2. Water and Electrolyte Balance and Disorders	3. Surgical Shock	4. Multiple Organ Dysfunction	5. Trauma	6. Surgical Infection	7. Theoretical Knowledge of Cardiopulmonary Resuscitation (CPR)	8. Surgical Nutrition	9. Principles of Preoperative Preparation and Postoperative Management	10. Rational Clinical Blood Use	11. Indications for Surgical Blood Transfusion	12. Basic Surgical Medications	13. Fundamental Theory of Laparoscopic Surgery	14. Emergency Management Principles for Critically Ill General Surgery Patients	15. Advances in Organ Transplantation	16. Surgical Dressing Change	17. Surgical Techniques: Incision, Exposure, Suturing, Ligation, and Hemostasis	18. Catheterization	19. Venotomy	20. Central Venous Pressure Measurement	21. Biopsy	22. Abdominal Paracentesis	23. Practical CPR Skills	24. Fine-Needle Aspiration Biopsy of Superficial Masses	25. Furuncle and Furunculosis — Are 10 Cases Appropriate? Yes / No — 1/2	26. Acute Mastitis — Is 1 Case Appropriate? Yes / No =1/2	27. Carbuncle — Is 1 Case Appropriate? Yes / No =1/2	28. Systemic Acute Suppurative Infection — Are 2 Cases Appropriate? Yes / No =1/2	29. Acute Cellulitis and Erysipelas — Are 5 Cases Appropriate? Yes / No =1/2	30. Anal Fistula, Anal Papillitis, and Perianal Infection — Are 5 Cases Appropriate? Yes / No =1/2	31. Acute Lymphangitis and Lymphadenitis — Are 5 Cases Appropriate? Yes / No =1/2	32. Internal and External Hemorrhoids — Are 10 Cases Appropriate? Yes / No =1/2	33. Phlebitis — Are 3 Cases Appropriate?Yes / No =1/2	34. Superficial Tumors — Are 20 Cases Appropriate? Yes / No =1/2	35. Abscess — Are 5 Cases Appropriate? Yes / No =1/2	36. External Hernia — Are 5 Cases Appropriate? Yes / No =1/2	37. Acute Appendicitis — Are 5 Cases Appropriate? Yes / No =1/2	38. Mammary Gland Hyperplasia — Are 5 Cases Appropriate? Yes / No =1/2	39. Thyroid Adenoma or Nodular Goiter — Are 5 Cases Appropriate? Yes / No =1/2	40. Gallstones — Are 5 Cases Appropriate? Yes / No =1/2	41. Breast Cancer — Are 5 Cases Appropriate? Yes / No =1/2	42. Intestinal Obstruction — Are 5 Cases Appropriate? Yes / No =1/2	43. Gastrointestinal Tumors — Are 5 Cases Appropriate? Yes / No=1/2	44. Hernia Repair — Are 5 Cases Appropriate? Yes / No =1/2	45. Appendectomy — Are 5 Cases Appropriate? Yes / No =1/2	46. Biopsy of Superficial Masses — Are 5 Cases Appropriate? Yes / No =1/2	47. Thyroid Surgery — Are 5 Cases Appropriate? Yes / No =1/2	48. Participation in Thyrotoxicosis or Bilateral Subtotal Thyroidectomy — Are 10 Cases Appropriate? Yes / No =1/2	49. Participation in Colectomy — Are 5 Cases Appropriate? Yes / No =1/2
身份（1代表女性，2代表男性）	1、消毒与无菌技术	2.水与电解质平衡及紊乱	3.外科休克	4.多器官功能障碍	5.创伤	6.外科感染	7.心肺复苏理论知识	8.外科营养	9.术前准备和术后处理原则	10.临床合理用血知识	11.外科输血指征	12.外科基本用药	13.腹腔镜手术基本理论	14.普通外科危重病人的抢救原则	15.器官移植进展状况	16.外科换药	17.外科手术切开、显露、缝合、结扎、止血技术	18.导尿	19.静脉切开	20.中心静脉压测量	21.活组织检查	22.腹腔穿刺术	23.心肺复苏实践操作	24.浅表肿物针吸活检	25.疖和疖病 10例是否合适?是 否---建议（ ） 例	26.急性乳腺炎 1例是否合适?是 否---建议（ ）例	27.痈 1例是否合适?是 否---建议（ ）例	28.全身急性化脓性感染 2例是否合适?是 否---建议（ ） 例	29.急性蜂窝织炎、丹毒 5例是否合适?是 否---建议（ ）例	30.肛瘘、肛乳头炎、肛门周围感染 5例是否合适?是 否---建议（ ）例	31.急性淋巴管炎、淋巴结炎 5例是否合适?是 否---建议（ ） 例	32.内、外痔 10例是否合适?是 否---建议（ ） 例	33.静脉炎 3 例是否合适?是 否---建议（ ）例	34.体表肿瘤 20例是否合适?是 否---建议（ ） 例	35.脓肿 5 例是否合适?是 否---建议（ ） 例	36.腹外疝 5例是否合适?是 否---建议（ ） 例	37.急性阑尾炎 5 例是否合适?是 否---建议（ ） 例	38.乳腺增生 5例是否合适?是 否---建议（ ） 例	39.甲状腺瘤或结节性甲状腺肿 5 例是否合适?是 否---建议（ ） 例	40.胆囊结石 5例是否合适?是 否---建议（ ） 例	41.乳腺癌 5 例是否合适?是 否---建议（ ） 例	42.肠梗阻 5例是否合适?是 否---建议（ ）例	43.胃肠肿瘤 5例是否合适?是 否---建议（ ） 例	44.完成疝修补术 5 例是否合适?是 否---建议（ ） 例	45.完成阑尾切除术 5例是否合适?是 否---建议（ ） 例	46.完成体表肿物活检 5 例是否合适?是 否---建议（ ） 例	47.完成甲状腺手术 5例是否合适?是 否---建议（ ） 例	48.参与甲亢或双侧甲状腺次全切除术 10 例是否合适?是 否---建议（ ） 例	49.参与结肠切除术 5例是否合适?是 否---建议（ ） 例
1	4	4	4	4	3	3	3	4	4	4	4	4	3	4	3	4	4	3	3	3	4	4	3	4	1	2	2	2	1	1	1	1	2	1	1	1	1	1	1	1	1	2	1	1	2	1	1	1	1
1	4	4	4	4	3	3	4	3	4	3	4	3	3	4	3	4	4	4	2	3	4	3	4	2	2	1	2	1	1	1	1	1	1	1	1	1	1	2	1	1	1	1	1	1	1	1	2	2	1
1	4	4	4	3	2	3	4	4	4	4	4	3	3	3	3	3	4	4	3	3	3	3	4	3	2	1	2	2	2	1	2	2	2	2	2	1	1	1	1	1	1	1	1	2	1	2	1	2	1
1	4	4	4	4	4	4	4	4	4	4	4	4	4	4	4	4	4	4	3	4	4	4	4	4	1	1	1	1	1	1	1	1	1	1	1	1	1	1	1	1	1	1	1	1	1	1	1	1	1
1	4	4	4	4	4	4	4	4	4	4	4	4	4	4	4	4	4	4	4	4	4	4	4	4	1	1	1	1	1	1	1	1	1	1	1	1	1	1	1	1	1	1	1	1	1	1	1	1	1
1	4	4	4	4	4	4	4	4	4	4	4	3	3	4	3	4	3	3	2	2	2	3	3	2	2	2	2	1	1	2	1	1	1	1	1	1	1	2	1	1	1	1	1	2	2	1	2	1	1
1	4	4	4	4	4	4	4	4	4	4	4	4	4	4	4	4	4	4	4	4	4	4	4	4	1	1	1	1	1	1	1	1	1	1	1	1	1	1	1	1	1	1	1	1	1	1	1	1	1
2	4	4	4	4	4	4	4	4	4	4	4	4	4	4	4	4	4	4	4	4	4	4	4	4	1	1	1	1	1	1	1	1	1	1	1	1	1	1	1	1	1	1	1	1	1	1	1	1	1
2	4	4	4	4	4	4	4	4	4	4	4	4	4	4	4	4	4	4	4	4	4	4	4	4	2	2	2	2	2	2	2	2	2	2	2	2	2	2	2	2	2	2	2	2	2	2	2	2	2
2	4	4	3	3	3	3	4	3	4	3	3	4	3	3	2	4	4	4	2	3	4	3	4	3	1	1	1	1	1	1	1	1	2	1	1	2	1	1	1	1	1	1	1	1	2	1	1	1	1
2	4	4	4	4	4	4	4	4	4	4	4	4	4	4	4	4	4	4	4	4	4	4	4	4	1	1	1	1	1	1	1	1	1	1	1	1	1	1	1	1	1	1	1	1	1	1	1	1	1
2	4	4	4	4	4	4	4	4	4	4	4	4	4	4	2	4	4	3	4	3	4	4	4	4	1	1	1	1	1	1	1	1	1	1	1	1	1	1	1	1	1	1	1	1	1	1	1	1	1
2	4	4	4	4	3	4	4	3	4	2	4	4	4	4	4	4	4	4	4	4	4	4	4	4	1	1	1	1	1	1	1	1	1	1	1	1	1	1	1	1	1	1	1	1	1	1	1	1	1
2	4	4	4	4	4	4	4	4	4	4	4	4	4	4	4	4	4	4	4	4	4	4	4	4	2	1	1	1	1	1	1	1	1	1	1	1	1	1	1	1	1	1	1	1	1	1	1	1	1
2	4	4	4	4	4	4	4	4	4	4	4	4	4	4	4	4	4	4	4	4	4	4	4	4	1	2	2	2	1	1	1	1	1	1	1	1	1	1	1	1	1	1	1	1	1	1	1	1	1
2	4	4	4	4	4	4	4	4	4	4	4	4	4	4	4	4	4	4	4	4	4	4	4	4	1	1	1	1	1	1	1	2	1	1	1	1	1	1	1	1	1	1	1	1	1	1	1	1	1
2	3	3	3	3	3	3	3	3	3	3	3	3	3	3	3	3	3	3	3	3	3	3	3	3	1	1	1	1	1	1	1	1	1	1	1	1	1	1	1	1	1	1	1	1	1	1	1	1	1
2	4	4	4	4	4	4	4	4	4	4	4	4	4	4	4	4	4	4	4	4	4	4	4	4	1	1	1	1	1	1	1	1	1	1	1	1	1	1	1	1	1	1	1	1	1	1	1	1	1
2	3	3	3	4	3	4	4	4	3	3	3	3	3	3	3	3	3	3	3	3	3	3	3	3	1	1	1	1	1	1	1	1	1	1	1	1	1	1	1	1	1	1	1	1	1	1	1	1	1
2	3	3	4	4	4	4	4	4	3	4	4	4	4	4	4	3	3	3	3	3	3	3	4	4	1	1	1	1	1	1	1	1	1	1	1	1	1	1	1	1	1	1	1	1	1	1	1	1	1
2	4	4	4	4	4	4	4	4	4	4	4	4	4	4	4	4	4	4	4	4	4	4	4	4	1	1	1	1	1	1	1	1	1	1	1	1	1	1	1	1	1	1	1	1	1	1	1	1	1
2	4	4	4	4	4	4	4	4	4	4	4	4	4	4	4	4	4	4	4	4	4	4	4	4	2	2	2	2	2	2	2	2	2	1	1	1	1	1	1	1	1	1	1	1	1	1	1	1	1
[truncated: 5 more columns]
