# Supplementary material
Source: Research Square preprint supplement (doi:10.21203/rs.3.rs-8568643/v1)
Supplement: Supplementary file 3 [file e6322a06af7b5f495c48631c.xlsx]

## Sheet: translation
身份	Identity
1、泌尿外科疾病病史的正确询问、采集、分析及病历的正确书写	1. Correct inquiry, collection, analysis of urological disease history and proper medical record documentation
2.泌尿外科常见病的发病机制	2. Pathogenesis of common urological diseases
3.临床特点	3. Clinical features
4.常用检查手段	4. Common diagnostic methods
5.诊断要领	5. Key points of diagnosis
6.适应证及治疗原则	6. Indications and principles of treatment
7.泌尿外科常用诊治方法(包括膀胱残余尿量的测定、前列腺液的采取与镜检、导尿术、膀胱穿刺造瘘术等)的操作技术	7. Operative techniques for common urological diagnostic and therapeutic methods (including post-void residual urine measurement, prostatic fluid collection and microscopy, catheterization, cystostomy, etc.)
8.泌尿外科急诊常见病(如肾绞痛、急性尿潴留、肾挫伤、膀胱损伤、尿道损伤等)的诊断与鉴别诊断及处理原则	8. Diagnosis, differential diagnosis, and management principles of common urological emergencies (such as renal colic, acute urinary retention, renal contusion, bladder injury, urethral injury, etc.)
9.急性肾衰竭的原因、临床表现及治疗原则	9. Causes, clinical manifestations, and treatment principles of acute renal failure
10.泌尿外科各种导管(包括各种囊腔导尿管、膀胱及肾造瘘管、D-J支架引流管及各种伤口引流管等)的用途及具体用法	10. Uses and specific applications of various urological catheters (including balloon catheters, cystostomy and nephrostomy tubes, double-J stents, wound drains, etc.)
11.各种医学影像学检查(包括泌尿系统平片、造影片、CT、MR、超声及放射性核素检查等)的应用	11. Application of various medical imaging examinations (including plain films, contrast studies, CT, MRI, ultrasound, and radionuclide studies of the urinary system)
12.泌尿外科腔内各种 TUR手术	12. Various transurethral resection (TUR) procedures in urology
13.经皮肾镜手术	13. Percutaneous nephrolithotomy (PCNL)
14.输尿管肾镜手术	14. Ureterorenoscopy (URS)
15.腹腔镜手术	15. Laparoscopic surgery
16.腔内热疗等的基本原理和手术方式	16. Basic principles and surgical techniques of intracavitary thermotherapy, etc.
17.体外冲击波碎石(ESWL)的基本原理和操作方法	17. Basic principles and operating procedures of extracorporeal shock wave lithotripsy (ESWL)
18.男科常见病的诊治要点及进展情况	18. Key points and advances in diagnosis and treatment of common andrological diseases
19.金属探条及丝状探子扩张尿道	19. Urethral dilation using metal bougies and filiform probes
20.前列腺针吸细胞学及穿刺活检	20. Prostatic needle aspiration cytology and biopsy
21.尿动力学检查	21. Urodynamic studies
22.膀胱镜检查	22. Cystoscopy
23.泌尿生殖系炎症 10例是否合适?是/否=1/2	23. Is 10 cases of genitourinary inflammation appropriate? Ye/No=1/2
24.前列腺增生症 5例是否合适?是/否=1/2	24. Is 5 cases of benign prostatic hyperplasia (BPH) appropriate? Ye/No=1/2
25.精索静脉曲张 2例是否合适?是/否=1/2	25. Is 2 cases of varicocele appropriate? Ye/No=1/2
26.膀胱癌 4例是否合适?是/否=1/2	26. Is 4 cases of bladder cancer appropriate? Ye/No=1/2
27.前列腺癌 1例是否合适?是/否=1/2	27. Is 1 case of prostate cancer appropriate? Ye/No=1/2
28.睾丸鞘膜积液 1例是否合适?是/否=1/2	28. Is 1 case of hydrocele appropriate? Ye/No=1/2
29.隐睾 1例是否合适?是/否=1/2	29. Is 1 case of cryptorchidism appropriate? Ye/No=1/2
30.泌尿系结石6例是否合适?是/否=1/2	30. Is 6 cases of urinary calculi appropriate? Ye/No=1/2
31.肾肿瘤 2 例是否合适?是/否=1/2	31. Is 2 cases of renal tumor appropriate? Ye/No=1/2
32.膀胱造瘘术 1例是否合适?是/否=1/2	32. Is 1 case of cystostomy appropriate? Ye/No=1/2
33.精索静脉高位结扎术 1例是否合适?是/否=1/2	33. Is 1 case of high ligation of the spermatic vein appropriate? Ye/No=1/2
34.睾丸鞘膜翻转术 1例是否合适?是/否=1/2	34. Is 1 case of hydrocelectomy appropriate?Ye/No=1/2
35.睾丸切除术 1例是否合适?是/否=1/2	35. Is 1 case of orchiectomy appropriate? Ye/No=1/2
36.膀胱肿瘤手术1例是否合适?是 否---建议（ ） 例	36. Is 1 case of bladder tumor surgery appropriate? Ye/No=1/2
37.肾切除术 3 例是否合适?是/否=1/2	37. Is 3 cases of nephrectomy appropriate? Ye/No=1/2
38.输尿管结石的手术治疗 2例是否合适?是/否=1/2	38. Is 2 cases of surgical treatment for ureteral stones appropriate?Ye/No=1/2
39.前列腺增生手术 2例是否合适?是/否=1/2	39. Is 2 cases of surgery for benign prostatic hyperplasia appropriate? Ye/No=1/2
40.尿道狭窄手术 1例是否合适?是/否=1/2	40. Is 1 case of urethral stricture surgery appropriate?Ye/No=1/2
41.泌尿生殖系成形术 1例是否合适?是/否=1/2	41. Is 1 case of genitourinary reconstruction appropriate? Ye/No=1/2
42.腔内泌尿外科手术 3例是否合适?是/否=1/2	42. Is 3 cases of endourological surgery appropriate? Ye/No=1/2

## Sheet: Questionnaire
Identity (1 Teacher 2 Student)	1. Correct inquiry, collection, analysis of urological disease history and proper medical record documentation	2. Pathogenesis of common urological diseases	3. Clinical features	4. Common diagnostic methods	5. Key points of diagnosis	6. Indications and principles of treatment	7. Operative techniques for common urological diagnostic and therapeutic methods (including post-void residual urine measurement, prostatic fluid collection and microscopy, catheterization, cystostomy, etc.)	8. Diagnosis, differential diagnosis, and management principles of common urological emergencies (such as renal colic, acute urinary retention, renal contusion, bladder injury, urethral injury, etc.)	9. Causes, clinical manifestations, and treatment principles of acute renal failure	10. Uses and specific applications of various urological catheters (including balloon catheters, cystostomy and nephrostomy tubes, double-J stents, wound drains, etc.)	11. Application of various medical imaging examinations (including plain films, contrast studies, CT, MRI, ultrasound, and radionuclide studies of the urinary system)	12. Various transurethral resection (TUR) procedures in urology	13. Percutaneous nephrolithotomy (PCNL)	14. Ureterorenoscopy (URS)	15. Laparoscopic surgery	16. Basic principles and surgical techniques of intracavitary thermotherapy, etc.	17. Basic principles and operating procedures of extracorporeal shock wave lithotripsy (ESWL)	18. Key points and advances in diagnosis and treatment of common andrological diseases	19. Urethral dilation using metal bougies and filiform probes	20. Prostatic needle aspiration cytology and biopsy	21. Urodynamic studies	22. Cystoscopy	23. Is 10 cases of genitourinary inflammation appropriate? Ye/No=1/2	24. Is 5 cases of benign prostatic hyperplasia (BPH) appropriate? Ye/No=1/2	25. Is 2 cases of varicocele appropriate? Ye/No=1/2	26. Is 4 cases of bladder cancer appropriate? Ye/No=1/2	27. Is 1 case of prostate cancer appropriate? Ye/No=1/2	28. Is 1 case of hydrocele appropriate? Ye/No=1/2	29. Is 1 case of cryptorchidism appropriate? Ye/No=1/2	30. Is 6 cases of urinary calculi appropriate? Ye/No=1/2	31. Is 2 cases of renal tumor appropriate? Ye/No=1/2	32. Is 1 case of cystostomy appropriate? Ye/No=1/2	33. Is 1 case of high ligation of the spermatic vein appropriate? Ye/No=1/2	34. Is 1 case of hydrocelectomy appropriate?Ye/No=1/2	35. Is 1 case of orchiectomy appropriate? Ye/No=1/2	36. Is 1 case of bladder tumor surgery appropriate? Ye/No=1/2	37. Is 3 cases of nephrectomy appropriate? Ye/No=1/2	38. Is 2 cases of surgical treatment for ureteral stones appropriate?Ye/No=1/2	39. Is 2 cases of surgery for benign prostatic hyperplasia appropriate? Ye/No=1/2	40. Is 1 case of urethral stricture surgery appropriate?Ye/No=1/2	41. Is 1 case of genitourinary reconstruction appropriate? Ye/No=1/2	42. Is 3 cases of endourological surgery appropriate? Ye/No=1/2
1	3	3	3	3	3	2	2	2	3	4	3	3	3	3	3	3	2	3	3	3	3	3	1	1	1	1	1	1	1	1	1	1	1	1	1	1	1	1	1	1	1	1
1	4	4	4	4	4	4	4	4	4	4	4	4	4	4	4	1	4	4	4	4	4	4	1	1	1	1	1	1	1	1	1	1	1	1	1	1	1	1	1	1	1	1
1	4	4	4	3	4	3	2	4	4	3	3	2	2	2	2	2	3	3	3	2	2	2	2	1	2	1	1	2	2	1	1	1	2	2	2	1	1	2	1	1	2	1
1	4	3	3	4	4	4	4	4	4	4	3	3	2	3	2	1	3	2	3	4	3	3	1	1	1	1	1	1	1	1	1	1	1	1	1	1	1	1	1	1	1	1
1	4	3	4	4	4	4	4	3	3	4	3	2	2	3	2	2	3	3	3	2	2	3	1	1	1	1	1	1	1	1	1	1	1	1	1	1	2	1	1	1	1	1
2	4	4	4	4	4	4	4	4	4	4	4	4	4	4	4	4	4	4	4	4	4	4	1	1	2	1	2	2	2	1	1	2	2	1	2	2	1	2	1	1	1	1
2	3	3	3	4	4	4	4	4	4	4	4	4	4	4	4	4	4	4	4	4	4	4	1	1	1	1	1	1	1	1	1	1	1	1	1	1	1	1	1	1	1	1
2	3	3	3	3	4	4	3	4	3	2	3	3	2	3	3	2	2	2	2	2	2	2	1	1	1	1	1	1	1	1	1	1	1	1	1	1	1	1	1	1	1	1
2	4	3	3	4	3	4	4	4	4	3	3	4	4	4	4	3	3	2	3	4	3	3	1	1	1	1	2	1	1	2	1	1	1	1	1	1	1	2	2	1	1	1
2	4	4	4	4	4	4	4	4	4	4	4	4	4	4	4	4	4	4	4	4	4	4	1	1	1	1	1	1	1	1	1	1	1	1	1	1	1	1	1	1	1	1
2	4	4	4	4	4	4	4	4	4	4	4	4	4	4	4	4	4	4	4	4	3	4	1	2	2	2	2	1	1	2	2	2	1	1	1	2	2	2	2	1	2	1
2	3	3	3	3	3	3	3	3	3	3	3	3	3	3	3	3	3	3	3	3	3	3	1	2	2	2	2	2	2	1	2	2	2	2	2	2	2	2	2	2	2	2
2	4	4	4	4	4	4	4	4	4	4	4	3	4	4	4	4	4	4	4	3	4	4	1	1	1	1	1	1	1	1	1	1	1	1	1	1	1	1	1	1	1	1
2	4	4	4	4	4	4	4	4	4	4	4	3	3	3	3	3	3	4	4	4	4	4	1	1	1	1	1	1	1	1	1	1	1	1	1	1	1	1	1	1	1	1
2	4	4	4	4	4	4	4	4	4	4	4	3	4	4	4	3	4	4	4	4	4	4	1	1	1	1	1	1	1	1	1	1	1	1	1	1	1	1	1	1	1	1
2	4	3	4	4	4	3	3	4	3	4	4	3	4	4	3	3	4	3	4	4	4	3	1	1	1	1	1	1	1	1	1	1	1	1	1	1	1	1	1	1	1	1
2	4	3	4	4	4	4	3	3	4	4	4	3	3	3	3	3	3	3	3	3	3	3	1	1	1	1	1	1	1	1	1	1	1	1	1	1	1	1	1	1	1	1
2	4	4	4	4	4	4	4	4	4	4	4	4	4	4	4	4	4	4	4	4	4	4	1	1	1	1	1	1	1	1	1	1	1	1	1	1	1	1	1	1	1	1
2	4	4	4	4	4	4	4	4	4	4	4	4	4	4	4	4	4	4	4	4	4	4	2	2	2	2	1	1	2	2	1	1	1	2	2	1	1	1	2	1	2	2
2	3	3	4	3	3	4	3	3	4	4	3	3	3	3	3	3	3	3	3	3	3	3	1	1	1	1	1	1	1	1	1	1	1	1	1	1	1	1	1	1	1	1
